# Supplementary material
Source: publisher figshare collection journal article supplement (https://asha.figshare.com/articles/dataset/_/13661378)
Supplement: Supplementary file 1 [file 1]

**Supplemental Material S4.** TOMASS intrarater reliability.

| Rater | Bites     |         | Masticatory Cycles |         | Number of Swallows |         | Time      |         | Signs of Aspiration |         |
|-------|-----------|---------|--------------------|---------|--------------------|---------|-----------|---------|---------------------|---------|
|       | Immediate | Delayed | Immediate          | Delayed | Immediate          | Delayed | Immediate | Delayed | Immediate           | Delayed |
| A     | 1.00      | 1.00    | 0.98               | 0.99    | 1.00               | 0.80    | 1.00      | 1.00    | 100%                | 100%    |
| B     | 1.00      | 0.99    | 1.00               | 0.98    | 0.90               | 0.63    | 1.00      | 1.00    | 100%                | 100%    |
| C     | 1.00      | 1.00    | 1.00               | 0.96    | 0.99               | 0.64    | 1.00      | 0.99    | 100%                | 100%    |
| D     | 1.00      | 0.81    | 1.00               | 0.96    | 0.97               | 0.88    | 1.00      | 0.99    | 100%                | 90%     |
| E     | 0.98      | 1.00    | 0.99               | 1.00    | 0.89               | 0.85    | 1.00      | 1.00    | 100%                | 100%    |
| F     | 1.00      | 0.98    | 1.00               | 1.00    | 0.88               | 0.81    | 1.00      | 1.00    | 100%                | 100%    |
| G     | 0.98      | 0.96    | 0.96               | 0.96    | 0.82               | 0.89    | 0.87      | 1.00    | 90%                 | 90%     |

ICCs used for all outcomes except signs of aspiration (percent exact agreement).
