# Supplementary material
Source: publisher figshare collection journal article supplement (https://asha.figshare.com/articles/dataset/_/13661378)
Supplement: Supplementary file 2 [file 1]

**Supplemental Material S1. TWST and TOMASS interrater reliability across all dyads.**

| Rater Dyad | TWST                      |      |                    |                     | TOMASS |                    |                    |      |                     |
|------------|---------------------------|------|--------------------|---------------------|--------|--------------------|--------------------|------|---------------------|
|            | Amount of Liquid Consumed | Time | Number of Swallows | Signs of Aspiration | Bites  | Masticatory Cycles | Number of Swallows | Time | Signs of Aspiration |
| A & B      | 1.00                      | 0.99 | 0.98               | 92%                 | 0.96   | 0.99               | 0.51               | 1.00 | 100%                |
| A & C      | 1.00                      | 0.95 | 0.97               | 100%                | 0.96   | 0.99               | 0.50               | 1.00 | 100%                |
| A & D      | 1.00                      | 0.95 | 0.98               | 75%                 | 0.48   | 0.97               | 0.85               | 0.99 | 90%                 |
| A & E      | 1.00                      | 0.96 | 0.97               | 100%                | 1.00   | 0.84               | 0.78               | 1.00 | 100%                |
| A & F      | 1.00                      | 0.97 | 0.95               | 83%                 | 0.99   | 0.98               | 0.58               | 0.99 | 100%                |
| A & G      | 1.00                      | 0.98 | 0.98               | 100%                | 0.85   | 0.95               | 0.75               | 1.00 | 90%                 |
| B & C      | 1.00                      | 0.97 | 0.99               | 92%                 | 0.99   | 0.98               | 0.85               | 1.00 | 100%                |
| B & D      | 1.00                      | 0.97 | 0.99               | 83%                 | 0.62   | 0.98               | 0.34               | 0.99 | 90%                 |
| B & E      | 1.00                      | 0.95 | 0.98               | 92%                 | 0.95   | 0.85               | 0.51               | 1.00 | 100%                |
| B & F      | 1.00                      | 0.98 | 0.98               | 92%                 | 0.92   | 0.93               | 0.28               | 1.00 | 100%                |
| B & G      | 1.00                      | 0.99 | 0.98               | 92%                 | 0.95   | 0.95               | 0.81               | 1.00 | 90%                 |
| C & D      | 1.00                      | 1.00 | 0.99               | 75%                 | 0.61   | 0.98               | 0.38               | 0.99 | 90%                 |
| C & E      | 1.00                      | 0.88 | 0.95               | 100%                | 0.96   | 0.89               | 0.64               | 1.00 | 100%                |
| C & F      | 1.00                      | 0.93 | 0.99               | 83%                 | 0.92   | 0.99               | 0.21               | 1.00 | 100%                |
| C & G      | 1.00                      | 0.96 | 0.98               | 100%                | 0.96   | 0.96               | 0.75               | 1.00 | 90%                 |
| D & E      | 1.00                      | 0.87 | 0.97               | 75%                 | 0.48   | 0.88               | 0.79               | 0.98 | 90%                 |
| D & F      | 1.00                      | 0.92 | 0.99               | 92%                 | 0.43   | 0.97               | 0.56               | 0.98 | 90%                 |
| D & G      | 1.00                      | 0.95 | 0.98               | 75%                 | 0.76   | 0.97               | 0.60               | 0.99 | 90%                 |
| E & F      | 1.00                      | 0.95 | 0.92               | 83%                 | 0.99   | 0.90               | 0.58               | 1.00 | 100%                |
| E & G      | 1.00                      | 0.94 | 0.96               | 100%                | 0.86   | 0.89               | 0.63               | 1.00 | 90%                 |
| F & G      | 1.00                      | 0.99 | 0.97               | 83%                 | 0.80   | 0.98               | 0.54               | 1.00 | 90%                 |

ICCs used for all outcomes except signs of aspiration (percent exact agreement). Raters A & B: PhD-level; Raters C, D, & E: Master’s level speech pathologists; Raters F & G: Master’s level students
