# Supplementary material
Source: publisher figshare collection journal article supplement (https://asha.figshare.com/articles/dataset/_/13661378)
Supplement: Supplementary file 3 [file 1]

**Supplemental Material S2.** Observations of oral intake interrater reliability across all dyads.

| Rater Dyad | Number of Swallows | Nasal Regurgitation | Anterior Labial Leakage | Cough | Throat Clear | Wet Vocal Quality |
|------------|--------------------|---------------------|-------------------------|-------|--------------|-------------------|
| A & B      | 0.98               | 100%                | 100%                    | 100%  | 96%          | 100%              |
| A & C      | 0.98               | 100%                | 100%                    | 100%  | 100%         | 100%              |
| A & D      | 0.96               | 100%                | 100%                    | 100%  | 96%          | 91%               |
| A & E      | 0.98               | 100%                | 100%                    | 100%  | 100%         | 100%              |
| A & F      | 0.98               | 100%                | 100%                    | 100%  | 100%         | 96%               |
| A & G      | 0.97               | 100%                | 100%                    | 100%  | 96%          | 86%               |
| B & C      | 0.99               | 100%                | 100%                    | 100%  | 96%          | 100%              |
| B & D      | 0.99               | 100%                | 100%                    | 100%  | 100%         | 91%               |
| B & E      | 0.95               | 100%                | 100%                    | 100%  | 96%          | 100%              |
| B & F      | 0.99               | 100%                | 100%                    | 100%  | 96%          | 96%               |
| B & G      | 0.95               | 100%                | 100%                    | 100%  | 96%          | 82%               |
| C & D      | 0.99               | 100%                | 100%                    | 100%  | 100%         | 91%               |
| C & E      | 0.96               | 100%                | 100%                    | 100%  | 100%         | 100%              |
| C & F      | 0.99               | 100%                | 100%                    | 100%  | 96%          | 96%               |
| C & G      | 0.96               | 100%                | 100%                    | 100%  | 100%         | 82%               |
| D & E      | 0.93               | 100%                | 100%                    | 100%  | 96%          | 91%               |
| D & F      | 0.99               | 100%                | 100%                    | 100%  | 96%          | 96%               |
| D & G      | 0.93               | 100%                | 100%                    | 100%  | 100%         | 82%               |
| F & E      | 0.97               | 100%                | 100%                    | 100%  | 100%         | 96%               |
| G & E      | 0.98               | 100%                | 100%                    | 100%  | 96%          | 82%               |
| F & G      | 0.96               | 100%                | 100%                    | 100%  | 96%          | 77%               |

Percent exact agreement used for all outcomes except number of swallows (ICCs). Raters A & B: PhD-level; Raters C, D, & E: Master’s level speech pathologists; Raters F & G: Master’s level students
