# Supplementary material
Source: publisher figshare collection journal article supplement (https://asha.figshare.com/articles/dataset/_/13661378)
Supplement: Supplementary file 4 [file 1]

**Supplemental Material S5.** Observations of oral intake intrarater reliability.

| Rater | Number of Swallows |         | Nasal Regurgitation |         | Anterior Labial Leakage |         | Cough     |         | Throat Clear |         | Wet Vocal Quality |         |
|-------|--------------------|---------|---------------------|---------|-------------------------|---------|-----------|---------|--------------|---------|-------------------|---------|
|       | Immediate          | Delayed | Immediate           | Delayed | Immediate               | Delayed | Immediate | Delayed | Immediate    | Delayed | Immediate         | Delayed |
| A     | 0.98               | 0.64    | 100%                | 100%    | 100%                    | 100%    | 100%      | 100%    | 100%         | 100%    | 100%              | 100%    |
| B     | 0.99               | 0.98    | 100%                | 100%    | 100%                    | 100%    | 100%      | 100%    | 96%          | 100%    | 100%              | 100%    |
| C     | 1.00               | 0.99    | 100%                | 100%    | 100%                    | 100%    | 100%      | 100%    | 96%          | 100%    | 100%              | 100%    |
| D     | 1.00               | 0.96    | 100%                | 100%    | 100%                    | 100%    | 100%      | 100%    | 100%         | 100%    | 100%              | 83%     |
| E     | 1.00               | 0.84    | 100%                | 100%    | 100%                    | 100%    | 100%      | 100%    | 100%         | 100%    | 100%              | 100%    |
| F     | 0.99               | 0.97    | 100%                | 100%    | 100%                    | 100%    | 100%      | 100%    | 100%         | 100%    | 100%              | 100%    |
| G     | 0.99               | 0.91    | 100%                | 100%    | 100%                    | 100%    | 100%      | 100%    | 100%         | 100%    | 91%               | 100%    |

Percent exact agreement used for all outcomes except number of swallows (ICCs).
