# Supplementary material
Source: publisher figshare collection journal article supplement (https://asha.figshare.com/articles/dataset/_/13661378)
Supplement: Supplementary file 5 [file 1]

**Supplemental Material S3.** TWST Intrarater reliability.

| Rater | Amount of Liquid Consumed |         | Time      |         | Number of Swallows |         | Signs of Aspiration |         |
|-------|---------------------------|---------|-----------|---------|--------------------|---------|---------------------|---------|
|       | Immediate                 | Delayed | Immediate | Delayed | Immediate          | Delayed | Immediate           | Delayed |
| A     | 1.00                      | 1.00    | 1.00      | 0.99    | 0.99               | 0.98    | 100%                | 100%    |
| B     | 1.00                      | 1.00    | 1.00      | 1.00    | 0.99               | 1.00    | 100%                | 100%    |
| C     | 1.00                      | 1.00    | 1.00      | 1.00    | 0.99               | 0.98    | 100%                | 100%    |
| D     | 1.00                      | 1.00    | 0.96      | 1.00    | 0.99               | 0.98    | 92%                 | 83%     |
| E     | 1.00                      | 1.00    | 0.96      | 1.00    | 0.99               | 0.99    | 100%                | 100%    |
| F     | 1.00                      | 1.00    | 1.00      | 1.00    | 1.00               | 0.99    | 100%                | 92%     |
| G     | 1.00                      | 1.00    | 1.00      | 1.00    | 0.99               | 0.91    | 100%                | 100%    |

ICCs used for all outcomes except signs of aspiration (percent exact agreement).
